# Supplementary material for: Primary Care Providers’ Prediabetes Screening, Testing, and Referral Behaviors
Source: PubMed Central journal article supplement — Am J Prev Med. Author manuscript; Available in PMC 2019 Aug 1. (PMC6241213; doi:10.1016/j.amepre.2018.04.017), 2018-06-20
Supplement: NIHMS994764-supplement-Supplemental_Material.pdf [file NIHMS994764-supplement-Supplemental_Material.pdf]

Appendix Figure 1. Conceptual model.

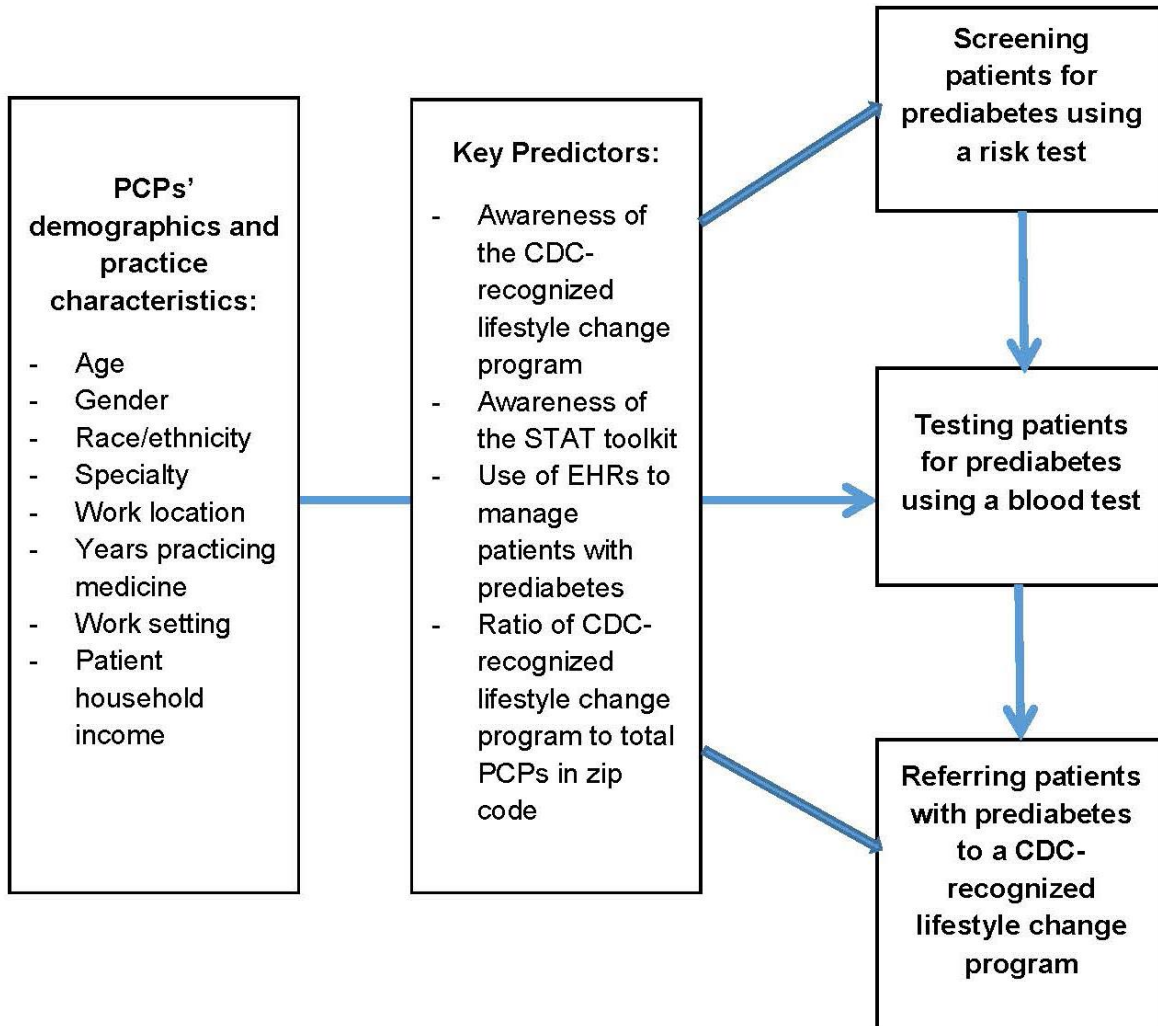

CDC, Centers for Disease Control and Prevention ; EHRs, electronic health records; PCPs, Primary Care Providers (family practitioners, internists, and nurse practitioners); STAT, Screen patients for prediabetes using a risk test, Test patients for prediabetes using a blood glucose test, and Act Today by referring patients with prediabetes to a CDC-recognized lifestyle change program.
